# Supplementary material for: Butyrate Supplementation at High Concentrations Alters Enteric Bacterial Communities and Reduces Intestinal Inflammation in Mice Infected with Citrobacter rodentium
Source: PubMed Central journal article supplement (PMC5566833; doi:10.1128/msphere.00243-17), 2017-08-23
Supplement: sph004172345sf4.pdf [file sph004172345sf4.pdf]

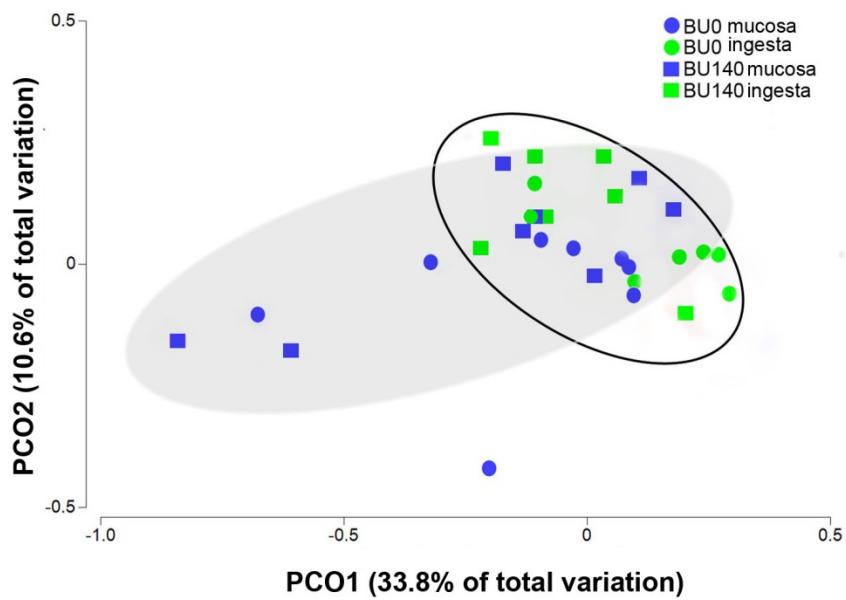

FIG S4
