# Supplementary material for: Butyrate Supplementation at High Concentrations Alters Enteric Bacterial Communities and Reduces Intestinal Inflammation in Mice Infected with Citrobacter rodentium
Source: PubMed Central journal article supplement (PMC5566833; doi:10.1128/msphere.00243-17), 2017-08-23
Supplement: sph004172345st6.pdf [file sph004172345st6.pdf]

**Table S1.** Description of the histological scoring criteria applied to cross-sections from the murine distal colon.

| <b>Histological Category</b>            | <b>0</b> | <b>1</b>                                                                                       | <b>2</b>                                                                                                            | <b>3</b>                                                                                                                                                             | <b>4</b>                                                                                                                                   |
|-----------------------------------------|----------|------------------------------------------------------------------------------------------------|---------------------------------------------------------------------------------------------------------------------|----------------------------------------------------------------------------------------------------------------------------------------------------------------------|--------------------------------------------------------------------------------------------------------------------------------------------|
| <b>Epithelial cell wall hyperplasia</b> | None     | Mild increase, mucosal crypt columns 2x the normal amount of cells, focal areas of hyperplasia | Moderate increase, mucosal crypt columns contain 3x the normal amount of cells, crowding of cells in base of crypts | Marked increase, mucosal crypt columns contain 4x the normal amount of cells, crowding of cells in base of crypts                                                    | Severe increase, villous distortion, mucosal crypts contain more than 5x the normal amount of cells, focal dysplasia of epithelium surface |
| <b>Crypt height</b>                     | Normal   | Mild increase, 25% increase crypt height                                                       | Moderate increase, 50% crypt height                                                                                 | Marked increase, 100% increase crypt height                                                                                                                          | Severe increase, >100% increase crypt height                                                                                               |
| <b>Epithelial cell injury</b>           | None     | Superficial; mild <10 surface epithelial cells shedding                                        | Moderate, focal erosions, 11-20 surface epithelial cells shedding                                                   | Marked, multi-focal erosions of surface epithelial cells                                                                                                             | Severe, multifocal erosions with or without deep crypt necrosis                                                                            |
| <b>Inflammation</b>                     | None     | Rare numbers of neutrophils and/or mononuclear cells present within the lamina propria         | Small numbers of neutrophils and or mononuclear cells present within the lamina propria                             | Large numbers of neutrophils and/or mononuclear cells within the lamina propria that on occasion focal to multi-focally extend into submucosa, muscularis and serosa | Large numbers of neutrophils and/or mononuclear cells within extensive areas of the lamina propria, submucosa, muscularis and serosa       |
| <b>Goblet Cell Depletion</b>            | Normal   | Low depletion of goblet cells, smaller size of mucin droplets                                  | Evident depletion of goblet cells, marked decrease of the size of mucin droplets                                    | Absent                                                                                                                                                               | Not applicable                                                                                                                             |
| <b>Mitotic Activity</b>                 | Normal   | Mild, small increase in mitotic activity in deep crypt epithelial cells                        | Moderate, prominent increase in mitotic activity in the basal half of crypt epithelial cells                        | Marked, prominent increase in mitotic activity that extends the entire length of crypt epithelial cells                                                              | Not applicable                                                                                                                             |

The maximal total score for tissue inflammation is 22.
