# Supplementary material for: Butyrate Supplementation at High Concentrations Alters Enteric Bacterial Communities and Reduces Intestinal Inflammation in Mice Infected with Citrobacter rodentium
Source: PubMed Central journal article supplement (PMC5566833; doi:10.1128/msphere.00243-17), 2017-08-23
Supplement: sph004172345st7.pdf [file sph004172345st7.pdf]

**Table S2.** Targets and primer sequences used to analyze the gene expression of cDNA harvested from murine colonic tissue.

| Primer                     | Sequence (5' to 3')                                 |
|----------------------------|-----------------------------------------------------|
| <i>Tnfa</i> *              | F:GATCGGTCCCAAAGGGATG<br>R: GCTCCTCCACTTGGTGGTTT    |
| <i>Tgfβ</i> *              | F: GTCCAAACTAAGGCTCGCCA<br>R: CATAGTAGTCCGCTTCGGGC  |
| <i>Reg3γ</i> *             | F: GATGCCCCATCTTCACGTAG<br>R: ACAAGGCATAGCAATAGGAGC |
| <i>MyD88</i> *             | F: ATCGCTGTTCTTGAACCCTC<br>R: CCAAGTACTCGAAGCCCATC  |
| <i>Muc2</i> *              | F: AAAGACCACAACAGGGCCAA<br>R: GGTCTGGTGGTCTCCAAAG   |
| <i>Il10</i> *              | F: ACAGCCGGGAAGACAATAAC<br>R: GGCAACCCAAGTAACCCTTA  |
| <i>Il4</i> *               | F: AGCAACGAAGAACACCACAG<br>R: TCGAAAAGCCGAAAGAGTC   |
| <i>Il17α</i> *             | F: GCAGCGATCATCCCTCAAAG<br>R: ACGTGGAACGGTTGAGGTAG  |
| <i>Il18</i> *              | F: GTGTCTTCCCGTGGACCTT<br>R: GGAGCCTGTAGTGCAGTTGT   |
| <i>Il22</i> *              | F: TGACACTTGTGCGATCTCTGA<br>R: CTTGCACCGGGTGTGACG   |
| <i>Infy (1)</i>            | F: ACGGCACAGTCATTGAAAGC<br>R: TCTGGCTCTGCAGGATTTTCA |
| <i>Tlr2</i> *              | F: GCTCCTGCGAACTCCTATCC<br>R: CAGCAGACTCCAGACACCAG  |
| <i>Tlr9</i> *              | F: CAGTTGCCGACTGGGTGTAT<br>R: GAGTCTTGCGGCTCCCATAG  |
| <i>Tff3</i> *              | F: TCTGGCTAATGCTGTTGGTG<br>R: ATACATTGGCTTGGAGACAGG |
| <i>Prg3</i> <sup>†</sup>   | F: AGCATAGAAGCTGCGTTGGA<br>R: GATCAGGGGCTGTTTCATGT  |
| <i>Relmβ</i> *             | F: TCTCAGTCGTCAAGAGCCTAA<br>R: AAGCACATCCAGTGACAACC |
| <i>LtB4r1</i> <sup>†</sup> | F: AAACCCTGTCCTTTTGTGGC<br>R: AGAACAATGGGCAACAGAGA  |

<sup>†</sup>Primer sequences developed from PCR arrays specific for butyrate-induced inflammation. \*Primers developed for this study using the NCBI database.

#### Reference

1. Ramos-Payán R, Aguilar-Medina M, Estrada-Parra S, González-y-Merchand JA, Favila-Castillo L, Monroy-Ostria A, Estrada-Garcia ICE. 2003. Quantification of Cytokine Gene Expression Using an Economical Real-Time Polymerase Chain Reaction Method Based on SYBR® Green I. Scand J Immunol 57:439-445.
